# Supplementary material for: CircCAMSAP1 promotes osimertinib resistance in NSCLC by stabilizing HSPA1A through inhibition of SMURF1-mediated ubiquitination
Source: Research Square preprint supplement (doi:10.21203/rs.3.rs-7552127/v1), 2025-09-18
Supplement: Supplementary file 1 [file 6028806dfa168a6ce4f60b5e.docx]

**SUPPLEMENTARY INFORMATION**

Figure S1.Establishment and validation of osimertinib-resistant NSCLC cell line model,related to Figure 1

Figure S2.CircCAMSAP1 promotes autophagy levels in NSCLC cells,related to Figure 4

Figure S3.HSPA1A promotes the proliferation of NSCLC cells and osimertinib resistance,related to Figure 5

Figure S4.SMURF1 promotes ubiquitinated degradation of HSPA1A protein,related to Figure 6

Figure S5.knockout efficiency of HnRNPA1,related to Figure 8


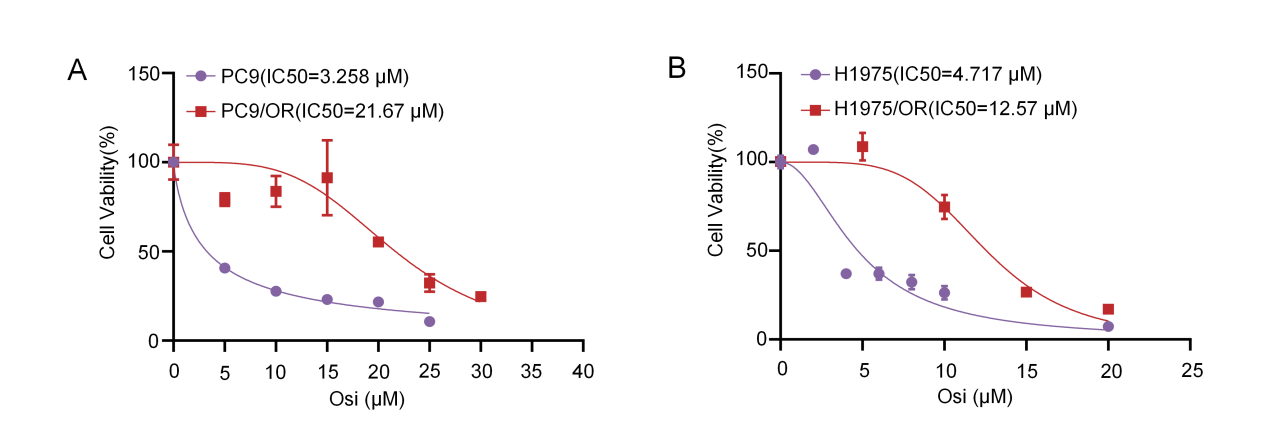


**Figure. S1.** **Establishment and validation of osimertinib-resistant NSCLC cell line model. (A-B)** WST-1 method to detect drug dose-effect curves drawn by PC9, PC9/OR, H1975, and H1975/OR cells for IC50 values of different concentrations of osimertinib.


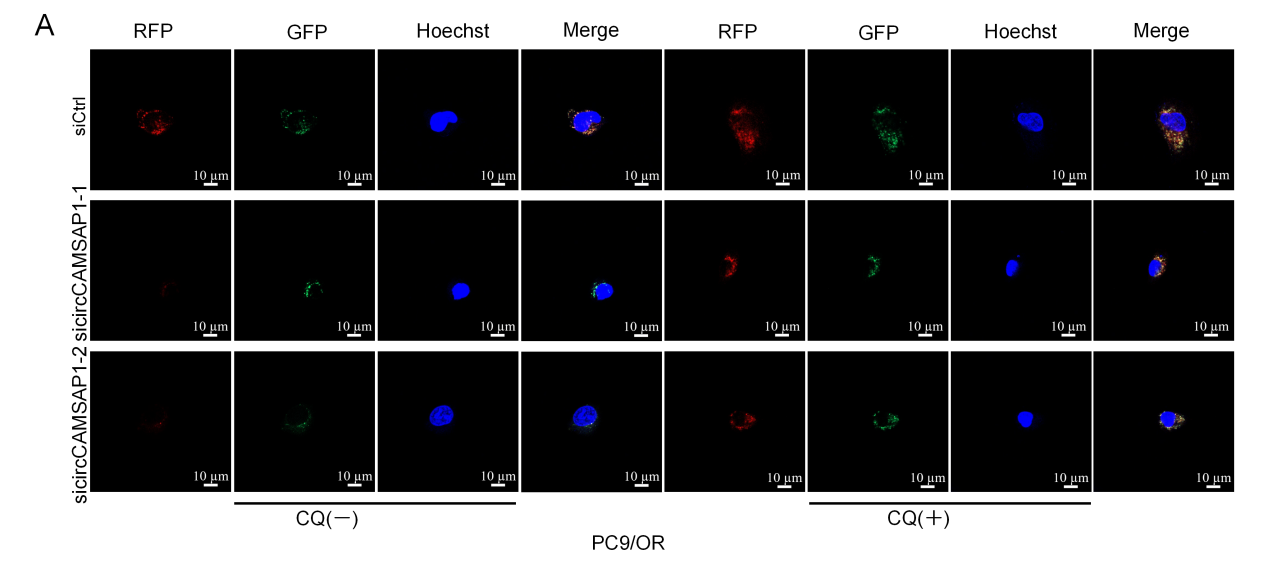


**Figure. S2.** **CircCAMSAP1 promotes autophagy levels in NSCLC cells.** **(A)** Representative images of autophagosome images of PC9/OR cells transfected with RFP-GFP-LC3 lentivirus after detection of circCAMSAP1 knockdown by confocal microscopy, with or without CQ treatment.

**
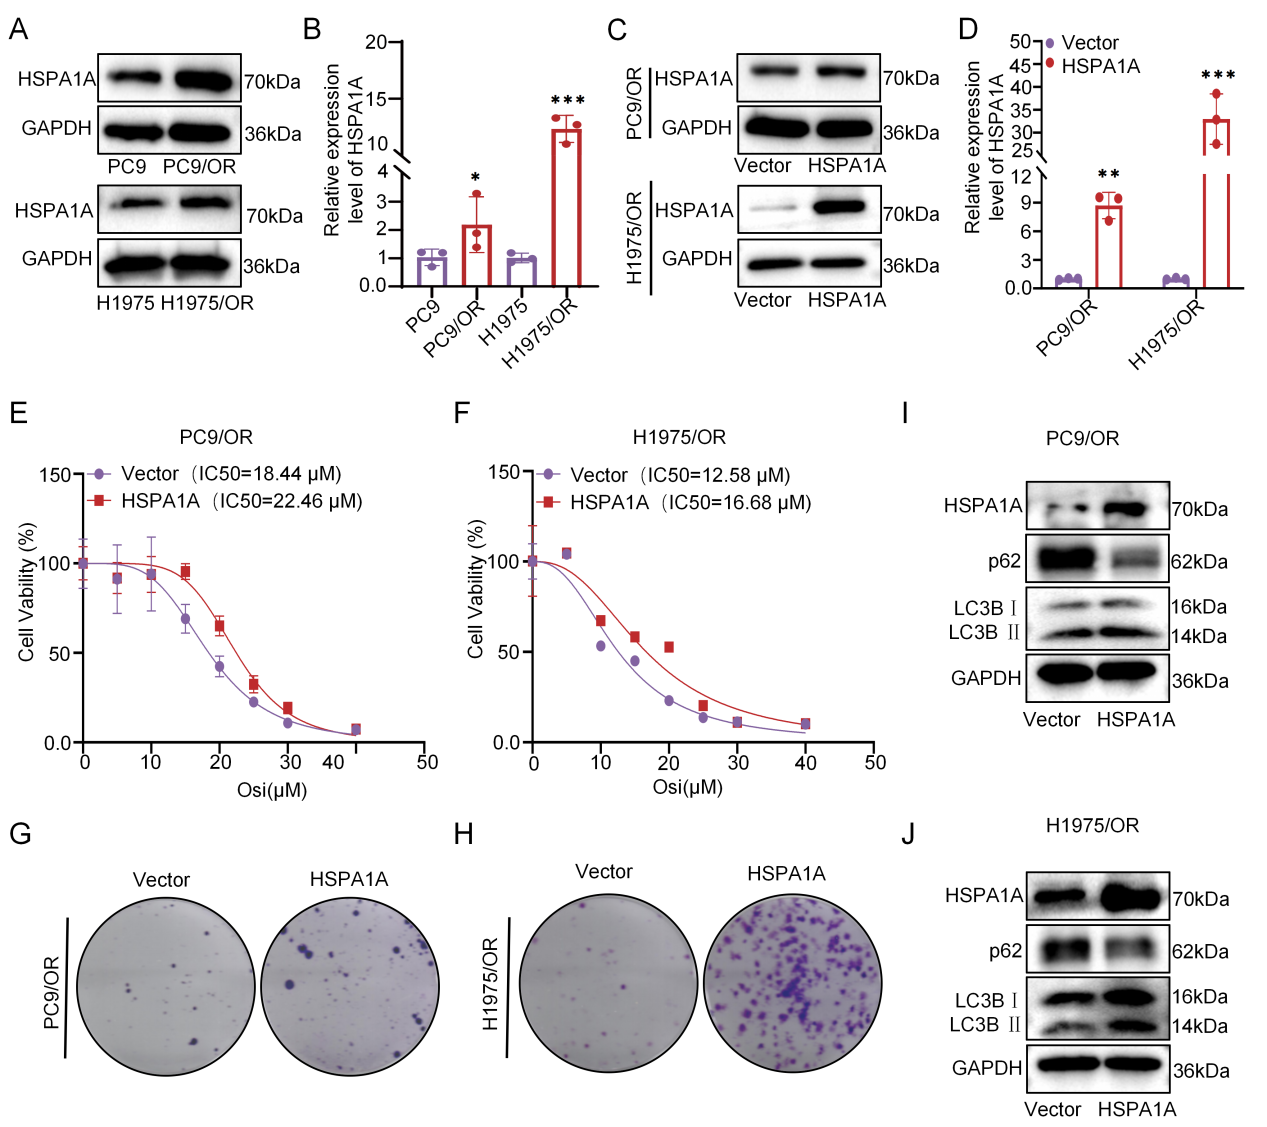
**

**Figure. S3.** **HSPA1A promotes the proliferation of NSCLC cells and osimertinib resistance.** **(A-B)** The expression of HSPA1A in osimertinib-sensitive cell lines (PC9 and H1975) and drug-resistant cell lines (PC9/OR and H1975/OR) was detected by western blot and RT-qPCR analysis. **(C-D)** Efficiency of overexpression of HSPA1A in drug-resistant cell lines (PC9/OR and H1975/OR) was detected by Western blotting and RT-qPCR analysis. **(E-F)** to assess PC9/OR and H1975/OR cell viability by overexpression of HSPA1A in different doses of Osimertinib. **(G-H)** clonal formation capacity of PC9/OR and H1975/OR cells after overexpression of HSPA1A was assessed by colony formation assay. **(I-J)** Detection of autophagy-related protein expression in PC9/OR and H1975/OR cells after overexpression of HSPA1A by Western blotting. * P＜0.05，** P＜0.01，*** P＜.001

**
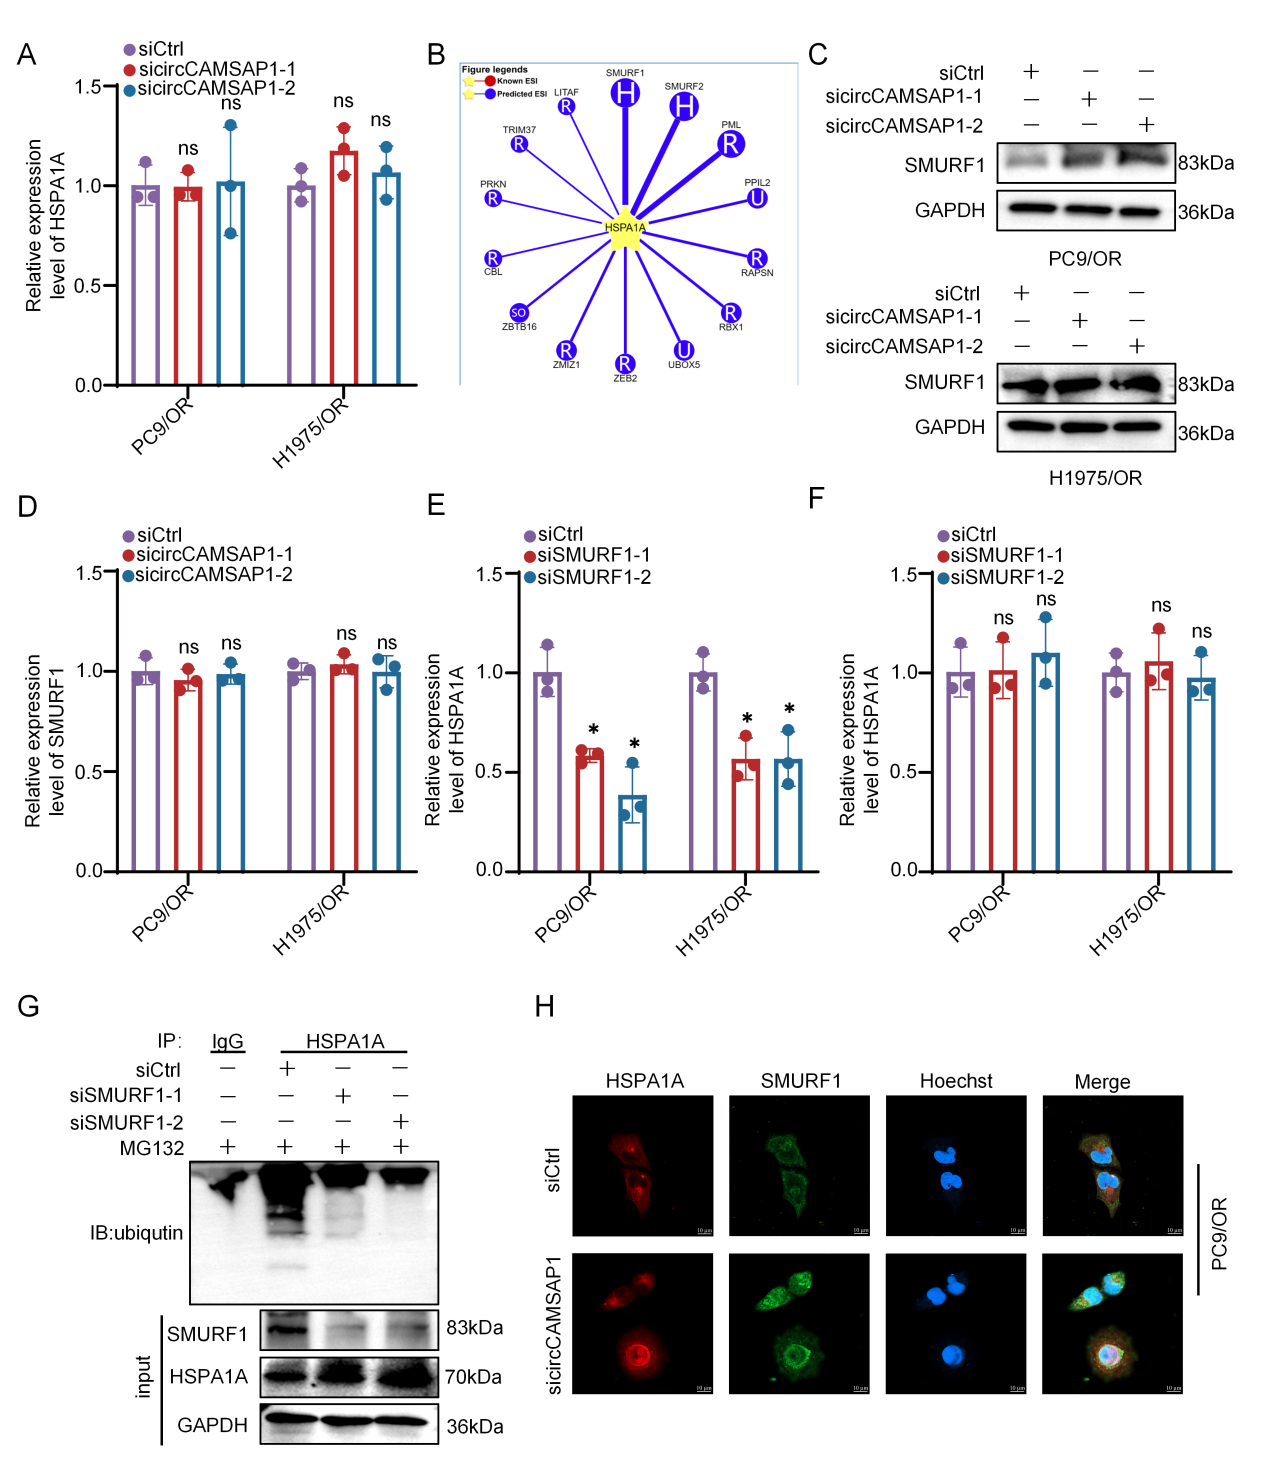
**

**Figure. S4.** **SMURF1 promotes ubiquitinated degradation of HSPA1A protein.** **(A)**Detection of the effect of silencing circCAMSAP1 on HSPA1A mRNA expression level by RT-qPCR analysis; **(B)** Ubibroswer website predicts SMURF1 protein as candidate E3 ubiquitin ligase for HSPA1A protein; **(C)** Western blot to detect the effect of knockdown of circCAMSAP1 on the expression level of SMURF1 protein; **(D)** Detection of the effect of silencing circCAMSAP1 on SMURF1 mRNA expression level by RT-qPCR analysis; **(E)** Detection of the silencing efficiency of SMURF1 transfected with siSMURF1 in PC9/OR and H1975/OR cells by RT-qPCR assay; **(F)** Detection of the effect of silencing SMURF1 on HSPA1A mRNA expression level by RT-qPCR analysis; **(G)** After transfection with siSMURF1, PC9/OR cells were treated with MG-132 (10 μM) to detect the ubiquitination modification level of HSPA1A protein by immunoprecipitation (Co-IP) assay. **(H)** Detection of cellular colocalization of SMURF1 and HSPA1A after knockdown of circCAMSAP1 by confocal microscopy. * P<0.05, ns The difference was not significant

**
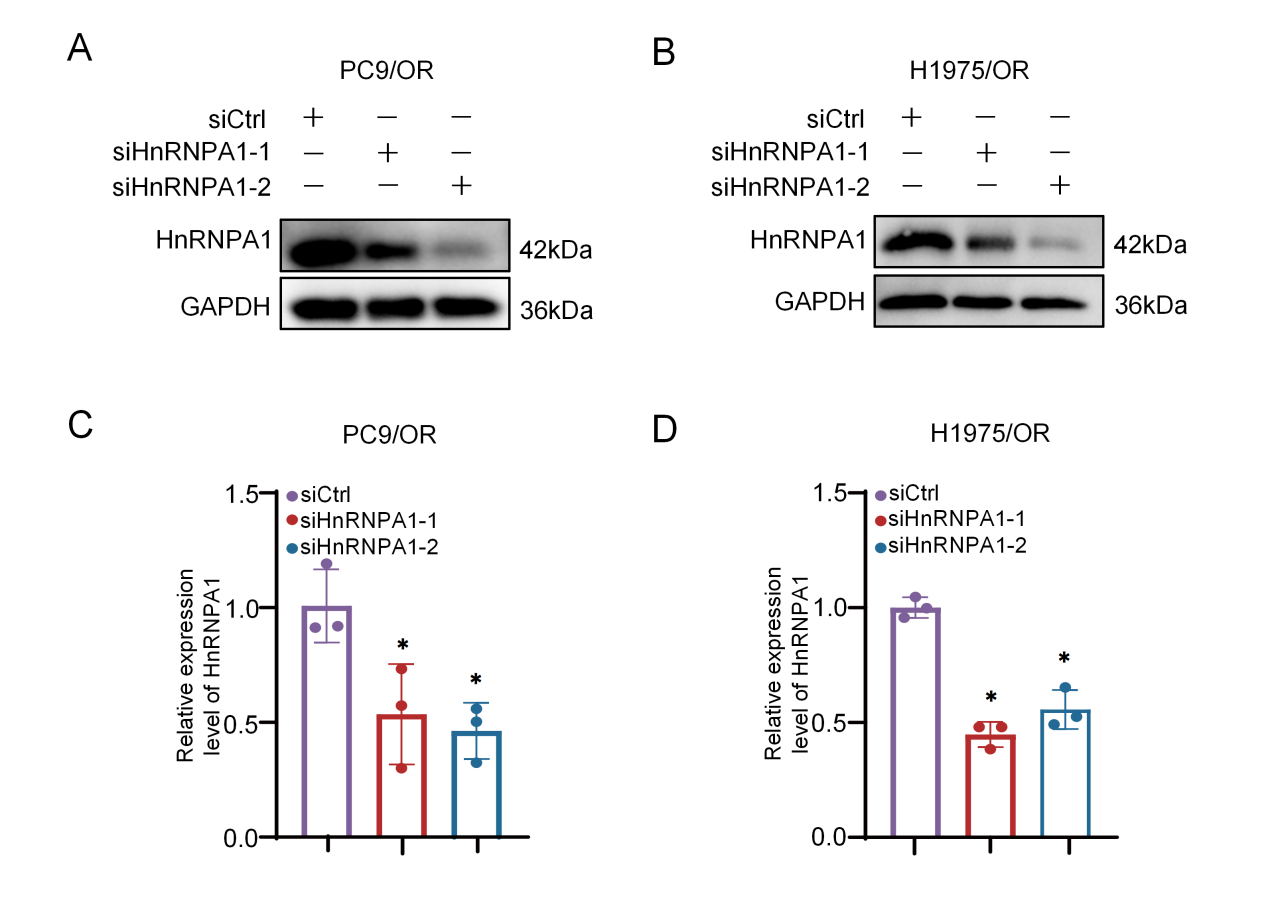
**

**Figure. S5.** **knockout efficiency of HnRNPA1.** **(A-D)** Detection of the silencing efficiency of HnRNPA1 transfected with siHnRNPA1 in PC9/OR and H1975/OR cells by Western blot and RT-qPCR analysis. * P＜0.05
