# Supplementary material for: CircCAMSAP1 promotes osimertinib resistance in NSCLC by stabilizing HSPA1A through inhibition of SMURF1-mediated ubiquitination
Source: Research Square preprint supplement (doi:10.21203/rs.3.rs-7552127/v1), 2025-09-18
Supplement: Supplementary file 2 [file b982ae796a6d2cc928d0ba7f.docx]

| Name | Sequence | Application |
| --- | --- | --- |
| GAPDH-F | 5’- GTCAAGGCTGAGAACGGGAA -3’ | RT-qPCR |
| GAPDH-R | 5’- AAATGAGCCCCAGCCTTCTC -3’ | RT-qPCR |
| CircCAMSAP1-F | 5’- GTGRCAAGCGCTTCTCAACG-3’ | RT-qPCR |
| CircCAMSAP1-R | 5’- GCTGGACAGGAGAAGCTTGA-3’ | RT-qPCR |
| CAMSAP1-F | 5’- GGGCGCTTTACTGCTACT-3’ | RT-qPCR |
| CAMSAP1-R | 5’- ACAGGTGGTTGTGGATTGT-3’ | RT-qPCR |
| HSPA1A-F | 5’- GAACGCCCTGGAGTCCTACG-3’ | RT-qPCR |
| HSPA1A-R | 5’- CACGAGATGACCTCTTGACACTTG-3’ | RT-qPCR |
| SMURF1-F | 5’- GATCCTCTCAGCCTCCCAAAGTG-3’ | RT-qPCR |
| SMURF1-R | 5’- AGCCAGTAGCAGTGTAAGCCAGA-3’ | RT-qPCR |
| U1-F | 5’-GGGAGATACCATGATCACGAAGGT-3’ | RT-qPCR |
| U1-R | 5’-CCACAAATTATGCAGTCGAGTTTCCC-3’ | RT-qPCR |
| HnRNPA1-F | 5’-TCAGAGTCTCCTAAAGAGCCC-3’ | RT-qPCR |
| HnRNPA1-R | 5’-ACCTTGTGTGGCCTTGCAT-3’ | RT-qPCR |
| HnRNPA1-a-F | 5’-TTGGCTCGGAACACAAGACA-3’ | RIP |
| HnRNPA1-a-R | 5’-CCACCTCCACAGAACAGCTC-3’ | RIP |
| HnRNPA1-b-F | 5’-CAGGCACGTGCTACTATGCT-3’ | RIP |
| HnRNPA1-b-R | 5’-TCAGGAGGTCAAGGAGGGAG-3’ | RIP |
