# Supplementary material for: CircCAMSAP1 promotes osimertinib resistance in NSCLC by stabilizing HSPA1A through inhibition of SMURF1-mediated ubiquitination
Source: Research Square preprint supplement (doi:10.21203/rs.3.rs-7552127/v1), 2025-09-18
Supplement: Supplementary file 3 [file d72417d7b0a4d50866c2e9a4.docx]

| Name | Sequence | Application |
| --- | --- | --- |
| Negative control | 正义链：5’-UUCUCCGAACGUGUCACGUTT-3’  反义链：5’-ACGUGACACGUUCGGAGAATT-3’ | siRNA target site |
| si-circCAMSAP1-1 | 正义链：5’-CUGGAUCAACAAGAUAACATT-3’  反义链：5’-UGUUAUCUUGUUGAUCCAGTT-3’ | siRNA target site |
| si-circCAMSAP1-2 | 正义链：5’-CAACAAGAUAACAUCCCUGTT-3’  反义链：5’-CAGGGAUGUUAUCUUGUUGTT-3’ | siRNA target site |
| si-SMURF1-1 | 正义链：5’-GGAAGUCAGAAGUACAGUUTT-3’  反义链：5’-AACUGUACUUCUGACUUCCTT-3’ | siRNA target site |
| si-SMURF1-2 | 正义链：5’-GCAUGAACUGAAACCCAAUTT-3’  反义链：5’-AUUGGGUUUCAGUUCAUGCTT-3’ | siRNA target site |
| si-HnRNPA1-1 | 正义链：5’-GCUAAUGCCGCUCCAUAAATT-3’  反义链：5’-UUUAUGGAGCGGCAUUAGCTT-3’ | siRNA target site |
| si-HnRNPA1-2 | 正义链：5’-CCUAGUAGCAUAGAGAUUUTT-3’  反义链：5’-AAAUCUCUAUGCUACUAGGTT-3’ | siRNA target site |
